# Supplementary material for: Tuning the structural stability and electrochemical properties in graphene anode materials by B doping: a first-principles study
Source: Royal Society of Chemistry journal article supplement (doi:10.1039/d2cp02730e), 2022-01-01
Supplement: d2cp02730e1.pdf [file d2cp02730e1.pdf]

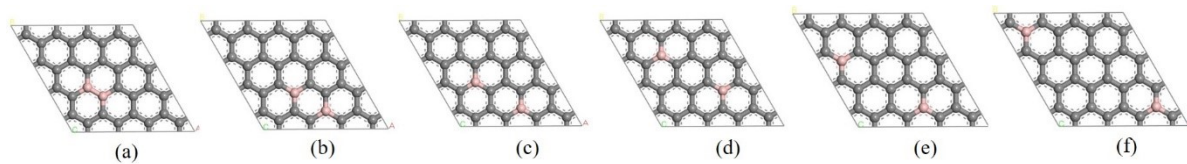

Fig. S1 Schematic diagram of the doping structure for different positions of B in B<sub>2</sub>C<sub>30</sub>

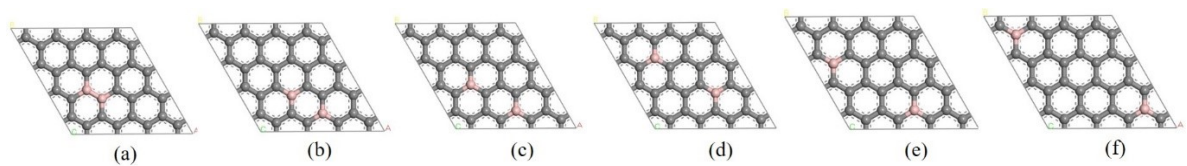

Fig. S2 Schematic diagram of the doping structure for different positions of B in B<sub>6</sub>C<sub>26</sub>

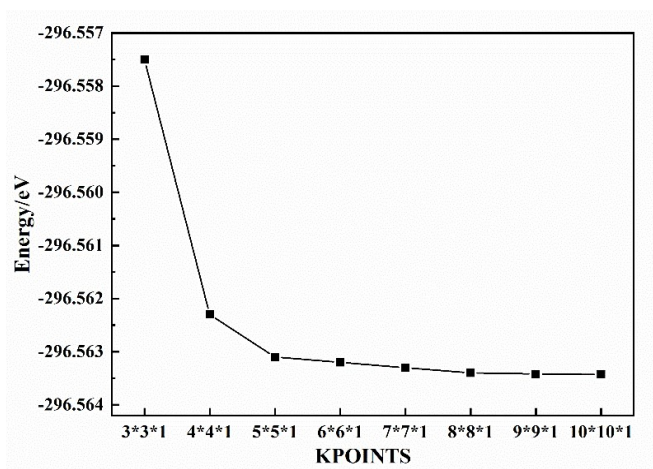

Fig. S3 The test data for K-point

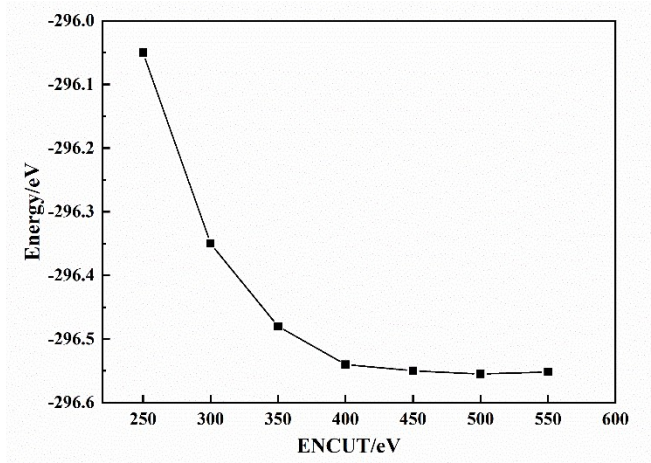

Fig. S4 The test for cut-off energy

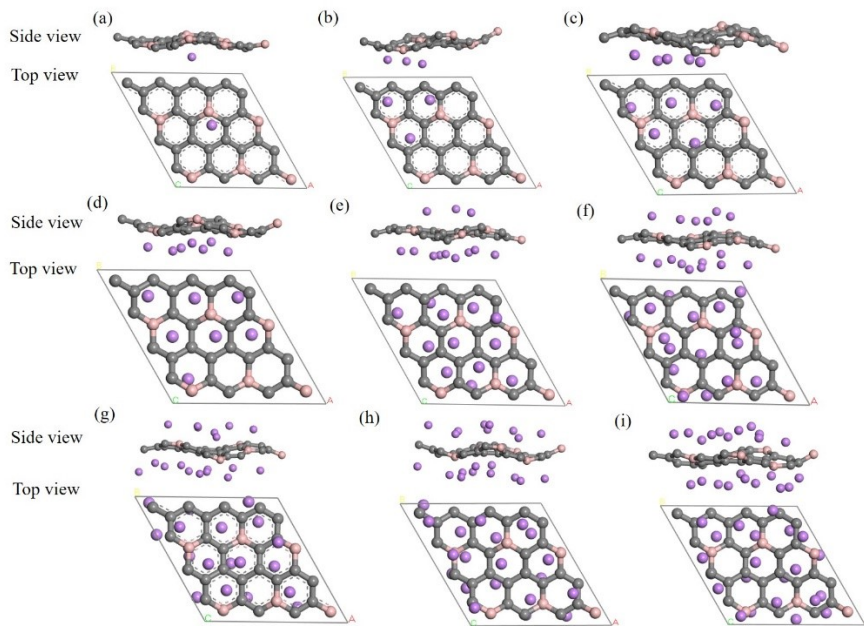

Fig. S5 Side and top views of  $B_6C_{26}$  doped structures with different amounts of Li-ion adsorption after structure optimization.

Table S1 Energy of  $B_2C_{30}$  doped structure with different positions of B

|             | (a)     | (b)     | (c)            | (d)     | (e)     | (f)     |
|-------------|---------|---------|----------------|---------|---------|---------|
| Energy (eV) | -286.85 | -287.35 | <b>-287.60</b> | -287.41 | -287.45 | -287.53 |

Table S2 Energy of B<sub>6</sub>C<sub>26</sub> doped structure with different positions of B

|             | (a)     | (b)            | (c)     | (d)     | (e)     |
|-------------|---------|----------------|---------|---------|---------|
| Energy (eV) | -269.64 | <b>-269.94</b> | -268.95 | -269.46 | -269.76 |

Table S3 The lattice constants B-doped graphene with different concentrations

| System                           | $a=b$ (Å) |
|----------------------------------|-----------|
| graphene                         | 9.847     |
| BC <sub>31</sub>                 | 9.898     |
| B <sub>2</sub> C <sub>30</sub>   | 9.946     |
| B <sub>6</sub> C <sub>26</sub>   | 10.065    |
| LiBC <sub>31</sub>               | 9.910     |
| LiB <sub>2</sub> C <sub>30</sub> | 9.954     |
| LiB <sub>6</sub> C <sub>26</sub> | 10.104    |
